# Supplementary material for: Inhibition of CERS1 in skeletal muscle exacerbates age-related muscle dysfunction
Source: eLife. 2024 Mar 20;12:RP90522. doi: 10.7554/eLife.90522 (PMC10954306; doi:10.7554/eLife.90522)
Supplement: Source data 1. [file elife-90522-data1.xlsx]

## Sheet: Fig 1-5 Source data
Figure 1B
YOUNG	OLD
0.988506	0.724034
1.01919	0.54533
0.769064	0.812393
0.948576	0.913397
1.12052	0.955249
1.15414	0.833481
	0.773578
	0.542618
	0.659173
	0.709589
Figure 1E
Time	Cers1			Cers2			Sptlc1			Degs1
0	1.13654	1.23511	0.628351	1.13654	1.23511	0.628351	0.876634	0.962625	1.16074	0.853193	1.02879	1.11802
24	1.89165	1.52588	1.53118	2.18805	1.55255	1.20134	0.309937	0.526697	0.71452	5.41119	4.77647	2.71499
48	8.16608	5.33188	10.0885	8.4248	7.88791	8.75218	24.7618	13.5954	24.9341	7.59971	6.30259	6.2374
96	52.3328	111.79	91.7504	14.7705	14.6684	22.8583	184.829	84.7444	82.1419	11.6798	9.35634	12.1758
144	218.221	349.62	281.042	22.3878	17.2634	28.8329	102.185	97.3458	96.6733	21.0529	16.1218	18.0753
192	329.616	391.982	581.906	44.4664	40.3541	79.0472	69.3126	93.3803	138.625	19.9864	23.6038	43.1397
Figure 1F
Time	MyoD			MyoD P053			MyoG Control			MyoG P053			Myf5 Control			Myf5 P053			Myf6 Control			Myf6 P053
0	1.13654	1.23511	0.628351	1.13654	1.23511	0.628351	1.13654	1.23511	0.628351	1.13654	1.23511	0.628351	1.13654	1.23511	0.628351	1.13654	1.23511	0.628351	1.13654	1.23511	0.628351	1.13654	1.23511	0.628351
24	1.3376	1.07896	1.08271	0.999753	1.05676	1.17662	5.57759	2.25737	4.33083	1.2567	0.223701	1.27867	0.147588	0.171305	0.126275	0.157088	0.0693309	0.101859	10.6269	8.16608	5.79433	11.0016	5.09698	13.9737
48	0.471276	0.539481	0.512152	0.533901	0.413123	0.719289	58.4707	74.0097			13.7813	16.9668	1.2437	1.46881	1.72865	0.936041	1.3944	2.53967	70.5045	42.655	26.7162	15.0286	34.8876
96	8.63169	6.81939	11.0398	10.2294	10.0885	4.56193	112.178	203.607	150.607	90.1742	107.608	98.3357	4.19783	17.5044	8.60183	5.02681	4.78873	3.7183		65.3286	53.6179	23.5825	27.1832	35.3746
144	9.18731	8.75218		4.92336			376.014	336.542	264.962		106.495	162.539	23.3386	13.451	7.28356	27.0891	32.1032	10.5901	84.7207	114.535	46.8392	35.2522	44.1592	24.6693
192	31.8814	22.3878		31.0096	24.4141	29.4387	255.051	262.222	292.977	107.982	124.469	119.813	26.0759	20.601	41.9222	6.51897	13.1742	11.9973	239.626	288.943	311.836	66.9329	70.7493	47.3287
Figure 2B
	Con						P053
Cer C14:0	17.47	30.77	20.3	21.15	19.52	21.82	15.21	17.91	18.45	19.13	19.98	22.23	27.95	13.47	13.33
Cer C16:0	26.1	34.71	21.33	30.74	25.12	33.93	29.14	29.51	24.71	26.56	29.37	25.23	35.29	23.33	22.99
Cer C18:0	385.41	399.18	410.14	480.31	472.26	465.29	246.8	284.31	15.86	260.73	295.56	34.5	235.13	126.3	315.59
Cer C18:1	22.78	34.32	16.88	34.55	25.97	17.25	13.86	10.23	197.62	15.24	10	235.01	14.06	15.27	8.2
Cer C20:0	226.45	256.53	172.87	329.77	187.43	206.68	182.41	169.36	43.95	201.42	223.63	50.28	170.39	161.52	134.19
Cer C22:0	56.76	65.29	41.32	59.71	43.27	50.42	46.08	51.96	78.66	58.02	56.44	77.55	60.17	59.08	53.08
Cer C24:0	93.76	80.07	52.58	77.45	56.93	133.69	132.52	107.12	72.29	141.74	128.79	72.79	112.28	91.31	93.69
Cer C24:1	81.29	80.86	52.07	86.4	61.03	100.27	106.77	93.22		117.35	87.09		119.01	99.39	80.02
Figure 2F
young	aged con	aged P053
0	1	0.5
0	0.5	1
0.5	0.5	1
0	0.5	1
0.5	0.5	1
0.5	0.5	1
Figure 2G
young	aged con	aged P053
0.23	2.2	4.58
0.92	2.81	3.5
2.06	2.01	3.93
1.25	1.85	2.27
1.11	2.74	5.98
1.3	2.47	2.12
Figure 2H
young	aged con	aged P053
25.967	26.05	16.76
24.464	17.37	16.92
27.835	15.47	8.72
28.776	14.85	13.75
39.427	23.29	10.34
24.985	18.48	15.21
31.5	23.21	17.01
23.971	27.91	16.14
		18.84
Figure 2I
young	aged con	aged P053
151.07	123.98	128.57
133.16	137.76	119.39
137.76	137.3	99.18
161.63	119.39	114.8
132.7	117.55	116.17
167.14	135	124.44
134.08	143.72	130.41
128.57	122.14	111.58
	137.76	127.19
	133.16	123.98
	124.9	116.63
	123.06	118.47
	121.22	115.71
Figure 3B
	Con						AAV
Cer C14:0	8.62	8.35	7.33	6.63	9.3	8.46	9.48	9.54	6.21	8.67	5.51	7.76	8.51	10.78	7.98
Cer C16:0	10.59	9.14	9.86	8.36	13.46	10.46	13.27	16.92	9.64	11.4	9.65	12.56	14.17	11.24	14.3
Cer C18:0	416.61	358.46	367.3	289.88	402.5	331.98	128.64	129.01	138.55	355.88	141.49	127.85	159.16	299.73	208.3
Cer C18:1	17.25	24.26	16.01	20.24	33.01	14.68	7.11	5.53	8.36	23.18	6.19	5.93	7.94	20.29	10.27
Cer C20:0	250.3	339.77	221.86	228.53	286.15	245.79	295	259.99	216.83	285.56	240.42	274.14	237.64	272.81	282.74
Cer C22:0	8.04	14.95	10.38	12.42	9.78	9.75	12.27	19.58	17.3	15.27	11.24	11.62	9.52	11.82	10.13
Cer C24:0	51.06	37	42.01	26.1	35.25	34.97	45.12	35	34.88	45.01	36.11	37.2	59.69	35.12	79.05
Cer C24:1	33.01	32.79	38.39	36.29	34.85	36.28	55.76	72.69	47.35	36.89	45.29	55.98	63.1	61.45	64.51
Figure 3F
Con	AAV
0.5	0.5
0.5	1
0.5	1
1	1
0.5	0.5
0.5	1
Figure 3G
Con	AAV
2.46	3.01
0.9	3.35
2.08	2.95
2.91	2.57
2.66	6.4
2.19	4.23
Figure 3H
Con	AAV
0.12	0.17
0.17	0.11
0.15	0.15
0.16	0.14
0.17	0.13
0.16	0.14
0.16	0.13
	0.14
Figure 3I
Con	AAV
122.73	96.17
116.85	92.75
158.12	131.67
159.03	106.17
103.45	90.1
114.43	124.1
114.93	69.98
176.18	106.27
Figure 4A
	Con						CERS1KD
Cer C14:0	44.77	63.12	30.61	14.15	17.34	59.7	28.35	39.28	49.15	35.34	32.38	43.74
Cer C16:0	401.36	434.58	539.1	398.93	369.19	551.6	439.8	552.77	563.51	518.91	519.9	495.79
Cer C18:0	64.69	71.88	79.5	137.85	148.13	93.34	47.77	28.04	41.36	48.73	41.35	38.75
Cer C18:1	44.08	93.58	82.89	81.8	94.2	29.89	9.67	29.19	40.65	13.2	33.58
Cer C20:0	2.57	3.18	2.06	1.66	2	7.99	7.1	2.16	4.86	4.84	3.44	6.7
Cer C22:0	1254.17	1102.65	129.61				93.85	497.09
Cer C24:0	513.93	894.48	781.98	1115.68	610.01	761.09	889.71	1095.89	775	1597.91	1567.81	1674.8
Cer C24:1	138.79	160.24	142.48	121.01	148.78	157.06	214.37	189.7	182.5	158.69	150.88	180.82
Figure 4C
Con MyoD	CerS1KD MyoD	Con MyoG	CerS1KD MyoG	Con Myh7	CerS1KD Myh7	Con Myh2	CerS1KD Myh2	Con Myh4	CerS1KD Myh4
0.77	1.18	0.97	0.39	1.5	0.18	0.81	0.7	0.08	0.01
0.87	1	1	0.2	0.7	0.1	1.36	0.75	1.07	0.12
0.88	1.17	0.95	0.31	0.63	0.37	0.47	0.63	1.3	0.02
1.78	0.33	1.05	0.36	1.29	0.11	1.31	1.04	1.55	0.01
0.7	0.55	1.03	0.39	0.88	0.28	1.05	0.74		0.04
Figure 4D
Day	Control
1	3.6	3.7	4.6	3.8	1.5	2.3	2.2	3.5	6.6	5.3	2	5.9	7	5.1	6.5	2.2	5.9	4.6	3.9	0.5	6.6		1.9	1.3	7.4	4.4	5.5	3.1	3.5	2.4	2.9	4.2	1.7
3	6.1	7.2	4.1	1.9	0.5	2.7	6.7	8.2	9	2.4		1.1	0.3	8.8	5.2	4.6	3.6	1.8	4.6	9.1	9.3	9.6	2	8.5	1.3	1.6	7	5.1	4.8	5.7	5.7	7.1	2.8	2.1	4.5	2	7.2	8.1	8.3	1.5	2.8	10.1	5.4	3.2	0.1
5	3.4	2.5	2.8	2.5	1.1	3.6	3.3	6.3	4	1	4.3	4.4	2.7	3	3.8	6.8	4.2	2	3.5	0.7	2.1	2.2	5	2.6	4.1	2.8	5.6	2.6	4.5	3.9	1	3.1	2.9	5.9	1	3.1	2.1	1.7	3.5	5.8	4.4	5.9	1.3	5.9	2.6	2.3	2.3	1.5	3.3
Figure 4F
Day	Control
1	2.16	4.46	2.26	3.47	3.22	5.46	2.46	5.96	3.44	4.25	2.35	5.14	1.54	4.08	2.28	1.92	5.23	4.31	2.36		2.29	2.53		2.57			3.89	3.78	3.3	4.75	2.9		1.66	3.63	4.8	1.79	1.6	4.35		3			1.5	5.19		2.86	5.61	2.45	5.56
3	4.07	2.63	2.54	6.43	4.32	4.06	3.14	6.58	2.91	4.97	4.66			2.14	2.98	3.73	3.71	2.57	4.24	4.43	5.78	2.82	6.56	4.26	3.32	2.44	5.33	4.76	2.68	2.78		6.25	4.58	2.33	4.48	4.62		6.37	3.31	3.41	2.16	4.19	5.61	5.45	2.3	4.74	5.35	2.19	3.63
5	2.82	2.47	3.36	5.21	2.48	2.39	3.53	3.85	3.9	2.12	4.71	1.99	1.76	1.68	3.87	2.42	2.39	5.91	1.93	2	2.13	2.76	2.91	1.96	1.77	3.49	3.89	3.36	1.6	1.16	1.36	2.54	2.48	2.22	1.93	2.08	2.97	2.49	1.46	1.64	1.14	5.25	2.46	4.81	3.95	4.2	6.32
Figure 4H
Days of adulthood	7	7	7	7	7	7	9	9	9	9	9	9	10	10	10	10	10	10	10	11	11	11	11	11	11	11	11	11	11	11	11	11	12	12	12	12	12	12	12	12	12	13	13	13	13	13	13	13	13
Con	0	0					1	1					1	1	1	1				1	1	1	1	1	1	1	1	1	0	0	0	0	1	1	1	1	1	1	1	1	0	1	1	1	1	1	1	1	1
P053	1	0	0	0	0	0	1	1	1	1	1	1	1	1	1	1	1	1	1	1	1	1	1	1	1								1	1	1	1	1	1	1			1	1	1	1	1	1	1	1
Figure 5E
shCON_MyoD	shCers1_MyoD	shCers1-Cers2_MyoD	shCON_MyoG	shCers1_MyoG	shCers1-Cers2_MyoG	shCON_Myh7	shCers1_Myh7	shCers1-Cers2_Myh7	shCON_Myh4	shCers1_Myh4	shCers1-Cers2_Myh4	shCON_Myh2	shCers1_Myh2	shCers1-Cers2_Myh2
0.98	1.13	0.81	0.95	0.94	0.9	0.98	0.47	0.66	0.79	0.84	1.34	0.93	0.95	1.03
1	1.12	0.89	1	0.83	1.2	1.04	0.54	0.57	1	0.44	1.25	1.07	0.59	0.96
0.88	0.66	0.59	1.04	0.59	1.15	1.16	0.46	0.55	1.23	0.71	1.12	0.88	0.72	0.86
0.88	1.15	0.66	0.97	0.91	1.38	0.8	0.48	0.58	0.76	0.7	1.02	0.88	0.84	0.8
1.18	1.06	0.7	1.09			0.85	0.54	0.58	0.78	0.8	1.2	0.99	0.77	0.89
0.73	0.71	1.45	0.78			1.07	0.44	0.71	1.07	0.68	0.9	0.87	0.76	0.88
1.27	1.37	1.04	1.15			1.19	0.35	0.85	1.16	0.67	0.78	1.25	0.85	1.29
1.08	1.09	0.88	1.02			0.92	0.61	0.9	1.21	0.82	1.2	1.13	0.84	1.32
[truncated: 136 more columns]

## Sheet: Suppl Fig 1-5 Source data
Figure 1—figure supplemnet 1B
Time	Cers1				Cers2				Degs1				Sptlc2
0	1.61768	1.04531	0.661553	0.675454	0.933977	1.17402	0.980411	0.911591	1.26013	1.26013	0.811447	0.6683	1.08858	1.11531	1.05515	0.740951
24	23.327	35.6031	37.7637		0.100932	0.194988	0.210437	0.131347	0.360624	0.602306	0.550406	0.708858	1.66146	1.08106	1.24613	1.19536
48	18.05	37.8948	37.5029		0.394052	0.385943	0.286471	0.323415	1.05597	0.992108	1.20044	0.958313	0.585382	0.534941	0.84525	0.769744
96	14.1128	11.4631	15.8228	11.2272	0.256398	0.0329508	0.0869578	0.180674	1.03783	0.18474	0.456463	0.482489	0.878096	0.967578	1.30355	1.13875
144	7.05639	5.34774	5.20151	7.64189	0.341856	0.213374	0.237576	0.331357	1.48305	1.45757	1.33198	1.36942	1.02275	0.819293	1.08482	0.816458
192	4.31371	5.71174	13.2593	4.7533	0.104492	0.080574	0.0591884	0.138356	1.07443	0.703962	0.351981	0.845906	1.26352	0.783199	1.59378	0.984491
Figure 1—figure supplemnet 1C
Time	Cer C14:0 Control				Cer C16:0 Control				Cer C18:0 Control				Cer C18:1 Control				Cer C20:0 Control				Cer C22:0 Control				Cer C24:0 Control				Cer C24:1 Control
0	0.92	1.31	0.61	1.16	1.02	1.02	0.83	1.12	1.27	1	0.86	0.87	1.75	1.17	0.46	0.62	1.11	1.6	0.53	0.76	0.54	1.31	0.58	1.57	1.06	0.97	0.97	1	1.02	1.03	0.9	1.05
24	2.52	2.31	4.04	4.27	1.92	1.46	1.54	1.85		0.82	0	1.83	9.79	7.89	4.87	4.16	1.46	0.23	0.42	2.44		0.41			1.76	1.11	2.46	2.27	1.68	1.14	1.79	1.68
48	14.9	7.41	6.83	7.07	3.77	4.2	3.03	3.17			6.85	0	66.99	18.83	37	29.31	4.21	3.26	3.24	0.37			2.1		4.3	4.77	3.89	3.39	5.41	5.24	3.65	1.91
96	2.09	2.5	5.61	3.64	1.61	1.93	1.84	1.65	1.39	1.33		1.24	0.74	3.96	10.08	7.6	0.78	0.2	6.27	0.51	3.16	2.69			1.09	1.58	3.16	1.63	1.56	2.1	2.62	2.28
144	4.83	3.95	5.25	3.67	0.94	1.34	1.28	1.68	0.82	1.42		3.02	3.01	5.59	3.39	6.22	0.82	0.2	0.75	1.51			1.2		1.22	1.52	0.85	1.37	2.76	2.38	1.52	1.75
192					1.03	1.85	1.26	1.41					10.33	9.67	5.62	25.82	2.39	3.18	7.54	9.65					0.97	1.14	0.85	1.61	2.24	1.21	1.55	1.58
Figure 1—figure supplemnet 1D
Time	Cer C14:0 Control				Cer C16:0 Control				Cer C18:0 Control				Cer C18:1 Control				Cer C20:0 Control				Cer C22:0 Control				Cer C24:0 Control				Cer C24:1 Control
0	0.84	1.36	0.8		1.19	0.95	0.86		1.79	0.48	0.73		1.38	0.93	0.69						1.21	0.8	0.99		1.25	0.9	0.85		1.36	0.81	0.84
24	2.02	0.85	1.35		1.04	0.63	0.91		0.93	0.39	0.74		0.74								0.85	1.07	1.29		0.94	0.7	0.82		1.03	0.6	0.84
48	2.63	4.04	3.18		1.23	1.83	1.24		0.62	2.22	0.96										5.12	8.1	3.07		1.26	1.45	1.07		1.01	1.66	1.05
96	3.03	4.88	2.53		1.43	1.41	1.54		1.38	2.53	1.66		2.6								9.07	8.17	9.86		1.43	1.97	1.05		0.98	0.98	0.96
144	9.93	9.51	9.96		6.81	7.99	7.16		8.29	10.01	8.34		1.19	2.37	1.79						11.57	14.18	27.43		2.6	2.68	2.31		3.73	4.65	3.71
192	29.8	43.5	74.92		13.19	14.97	12.58		17.38	21.85	25.54		5.71	17.29	49.12						24.47	18.91	15.68		5.16	7.03	7.13		6.92	6.63	6.03
Figure 1—figure supplemnet 1E
Time	MyoD Control				MyoD P053				MyoG Control				MyoG P053				Myf5 Control				Myf5 P053				Myf6 Control				Myf6 P053
0	1.4549	1.14943	0.923972	0.471694	1.4549	1.14943	0.923972	0.471694	1.26719	0.865515	0.980528	0.886769	1.26719	0.865515	0.980528	0.886769	1.17716	0.403408	1.41943		1.17716	0.403408	1.41943		0.716822	0.560461	1.72272		0.716822	0.560461	1.72272
24	0.859114	0.633283	0.389831		0.763617	0.750499	0.702671		7.34433	6.94816	6.50537	6.39361	0.86252	0.583025	0.43126	0.391377	1.94573	0.543485	0.673763	0.227717	1.32438	1.02123	0.949548	0.849869	0.539497	0.882511	0.336735	0.709407	0.806466	0.873383	0.891734	0.65961
48	1.83518	2.04333	2.36349		1.35277	1.41512	1.68287	2.89974		19.3147	27.41	26.2025	14.1392	19.9959	18.7866	28.8726	0.835269	0.237387	0.305726	0.429376		0.898327	0.283282	0.523156	0.809266	0.757693	0.524744	0.762964	0.787137	0.820563	0.70207	0.100112
96	1.64253	0.818425	1.04313	0.943387	0.294415	0.521566	0.779663	0.707559	19.5166	18.1048	11.4449	15.655	8.82521	6.90016	7.1683	7.95372	0.190163		0.637418	0.468237	0.21844	0.308921	0.138726	0.0813515	6.14616	6.55741	4.9406	4.09734	1.80211	2.07008	2.38615	1.89827
144	1.21919	1.2024	0.798809	1.10261	1.06505	1.34343	0.657892		10.279	8.34916	6.32748	10.208		7.39541	8.73393	4.77874	0.436881	0.0884075	0.450723	0.300474		0.110745	0.272686	0.213945	5.95741	7.67244	6.5645	5.57776	4.49925	2.59713	1.2223	2.0734
192	0.880211	0.986863	0.755719	0.758343	1.51669	0.692997	1.2405		4.89609	6.50537	5.84268	6.13316	11.7259	5.33923	11.8896		0.0618669	0.0488774	0.345154	0.166698	0.32428	0.0833492	0.122879		8.28032	16.3409	14.8433	18.2482	7.61945	12.8143	7.97059	12.6379
Figure 1—figure supplemnet 1F
Time	Myh2 Control			Myh2 P053			Myh7 Control			Myh7 P053			Myl1 Control			Myl1 P053			Myh1 Control			Myh1 P053
0	0.724337	0.94261	1.33305	0.724337	0.94261	1.33305	1.13654	1.23511	0.628351	1.13654	1.23511	0.628351	1.13654	1.23511	0.628351	1.13654	1.23511	0.628351	1.13654	1.23511	0.628351	1.13654	1.23511	0.628351
24	0.594494	0.87039	2.40283	1.29211	2.65688	0.84366	0.325255	0.894804	0.413123	0.304527	0.441242	0.315266	0.0417999	0.036642	0.0338346	0.0291501	0.0308121	0.0343069	10.7008	4.9576	8.66166	3.05176	2.68448	2.53967
48	14.7203	16.6187	22.3892	6.58751	6.3411	11.67	20.7443	20.3174	24.4989	4.7228	6.7958	15.2913	3.55449	3.61662	3.83611	1.59068	3.09436	2.47023	9.7787	10.6638	6.51897	15.2384	13.2199	11.5086
96	41.062	35.2544	29.9552	10.23	12.9936	4.70676	72.9908	105.394	47.9894	39.7985	38.0452	31.4425	26.3484	74.5245	75.8272	32.5513	35.7443	29.1342	41.9222	50.9017	37.6517	32.5513	35.7443	29.1342
144	37.1357	37.6541	77.1574	13.175	16.5039	9.21979	143.474	72.4866	59.287		34.8876	57.866	84.7207	93.6783	88.9328	78.5012	39.2506	19.6934	53.9909	69.0535	71.4887	35.2522	44.1592	24.6693
192	89.5569	66.9371	87.7139	27.1849	25.7185	36.3714	119.813	89.5513	117.347	58.2685	46.3547	88.3185	319.494	219.738	352.052	224.356	188.007	104.666	58.2685		58.6737	46.3547	42.0678	13.4977
Figure 1—figure supplemnet 1G
Time	Myh1 Control				Myh1 P053				Myh2 Control				Myh2 P053				Myh4 Control				Myh4 P053				Myl1 Control				Myl1 P053
0	1.1149	0.896211	1.48649	0.502401	1.1149	0.896211	1.48649	0.502401	0.712554	0.616029	1.67142		0.712554	0.616029	1.67142		0.930596	1.00781	1.06159		0.930596	1.00781	1.06159			0.80863	1.05962	1.13175		0.80863	1.05962	1.13175
24	1.92774	0.874731	1.32584	0.856729	0.104887	0.0617212	0.098886	0.104887	1.5327	0.570806	1.82269	0.514439	0.00413204	0.0204901	0.00142095	0.0698823	1.92016	1.12993	1.84194	1.182	0.189626	0.212602	0.331304	0.184441	27.3516	15.9839	19.0742	15.4931	1.60609	1.65124	1.69766	1.14358
48	5.28503	4.73023	3.41506	4.44416	3.46273	3.93649	4.14655	1.6323	6.59362	12.0092	5.03179	3.3895	5.50625	6.54808	6.17343	0.438628	2.77258	2.7439	3.88046	3.74828	3.57075	3.17384	3.92102	1.46533	21.1642	22.6832	34.8612	35.9657		37.1052	34.8612	40.8865
96	16.7016	20.3493	36.0496	21.067	15.2096	18.9209	16.4716	16.8177	22.1782	13.795	29.3659	22.41	17.4611	15.0958	30.2963	26.0114	66.5436	53.3061	78.0446	53.8632	31.806	48.0421	43.1216	32.8137	74.9861	91.9993	127.872	142.869	82.9144	84.9505	90.4188	57.6221
144	21.067	17.6538	19.5882	16.3012	18.0874	11.8919	16.0768	19.1851	31.913	22.3325	23.77	32.8102		18.6496	35.904	43.4436	76.4385	60.8096	78.8603	72.065	56.3455	67.2391	62.7363		144.864	119.308	141.882	110.167	48.1196	99.633	95.3938	120.974
192	20.0692	16.4716	28.7783	27.5105		14.2898	16.2449	19.9998	68.407	52.2034	73.3168	41.2428		57.5232	61.8658	66.5364	147.159	89.961	82.4946	113.082		67.9418	90.9012	81.0774	145.284	144.586		131.012		68.0513	132.841	106.415
Figure 2—figure supplemnet 1A
	Aged Control									Aged P053
dhCer C16:0	1.56	2.2	1.44	1.14	1.82	1.45	1.24			2.36	2.12	2.71	2.21	3.49	4.18	1.82	2.07
dhCer C18:0	6	6.76	6.77	11.42	9.71	9.11	7.49	7.13		3.76	6.17	5.56	5.37	7.02	4.83	5.64
dhCer C20:0	8.65	18.04	14.14	14.81	16.44	10.52	15.89			15.29	12.26	15.57	27.15	20.36	23.37	12.52	12.92
dhCer C22:0	0	0	0	0	0	0	0			0	0	0	0	0	0	0	0
dhCer C24:0	31.81	33.79	25.98	17.85	15.85	30.98	22.03			52.48	115.28	111.36	69.73	96.71	116.53	53.84	74.9
dhCer C24:1	0.03	0.04	0.03	0.03	0.04	0.05	0.04			0.24	0.43	0.46	0.27	0.18	0.24	0.12	0.17
Figure 2—figure supplemnet 1B
Young	Aged con	Aged P53
41.14	40.58	37.36
48.3	38.23	31.38
38.67	37.75	35.84
41.14	35.04	31.68
43.92	40.02	33.21
45.77		31.86
Figure 2—figure supplemnet 1C
Young	Aged con	Aged P53
2196	2033	1880
3061	1464	1122
1893	2460	1671
2755	1981	1254
2828	2089	1257
2777		1309
Figure 2—figure supplemnet 1E
young	aged con	P053	young	aged con	P053	young	aged con	P053	young	aged con	P053	young	aged con	P053
0.72	0.78	0.3	1.14	1.32	0.37	1.08	0.57	0.6	0.54	0.77	0.26	1.02	0.74	0.3
0.89	0.83	0.25	1.26	1.25	0.21	0.81	0.74	0.47	1.08	0.56	0.1	0.98	0.84	0.52
1.01	0.35	0.2	0.92	1.1	0.8	0.97	0.59	0.79	1.48	0.76	0.29	1.09	0.51	0.48
1.41	0.38	0.36	0.93	1.61	0.56	1.32	0.93	0.68	1.27	0.57	0.41	0.78	0.6	0.51
0.85	0.35	0.25	0.73	1.19	0.66	0.8	0.89	0.63	0.77	0.5	0.21	1.12	0.81	0.64
1.12	0.86	0.28	1.03	0.42	1.19	1.03		0.58	0.86	0.37	0.22	1.01	1.11	0.53
Figure 2—figure supplemnet 1F
young	aged con	P053
76.71	57.53	31.78
86.77	85.66	48.65
91.66	52.61	25.73
73.25	57.15	50.71
107.62	85.71	74.68
73.7	50.66	42.78
100.67	91.45	35.81
74.51	74.62	48.73
	87.34	64.64
	64.65	66.76
	65.43	85.64
	73.5	42.67
	66.66	55.68
	52.6
Figure 2—figure supplemnet 1G
young	aged con	P053
1061.24	710.74	333.07
1243.65	1239.1	569.41
1369.59	630.99	257.35
992.41	705.91	601.8
1733.54	1240.61	1020.75
1001.46	600.14	482.62
1589.83	1362.06	384.34
1016.68	1018.62	569.98
	1273.84	835.13
	834.16	874.35
	845.88	1239.78
	993.35	481.87
	872.35	682.76
	629.86
Figure 2—figure supplemnet 1H
Con	Cers1KD
1.22	0.39
0.81	0.61
0.9	0.55
0.97	0.41
1.41	0.73
0.69	0.82
Figure 2—figure supplemnet 1I
	Con						Cers1KD
DhCer C16:0	2.14	2.1	1.71	1.58	2.23	1.95	3.43	3.15	2.01	2.31	2.14	3.85	3.76	2.33	2.25
DhCer C18:0	8.74	9.28	8.18	5.39	9.28	5.64	6.05	6.82	4.75	4.88	4.22	6.16	5.85	5.45	6.83
DhCer C20	9.49	6.1	10.78	4.58	6.7	6.2	9.09	14.73	6.9	8.46	5.33	8.76	7.07	6.59	8.22
DhCer C22	0.0018	0.001	0.0014	0.0006	0.0016	0.001	0.0016	0.0008	0.0016	0.0036	0.0013	0.0013	0.0017	0.0009	0.0013
DhCer C24:0	36.1	18.1	14.6	11.6	15.9	28.4	76.2	155.1	64	13.9	66.6	72.4	118.8	12	53.4
DhCer C24:1	0.3827	0.4078	0.4429	0.3809	0.3423	0.4595	1.0955	2.1877	1.0681	0.5368	0.7257	1.1812	0.9007	0.6945	0.9832
Figure 2—figure supplemnet 1J
Con	Cers1KD
32.217	30.18
34.242	32.45
37.11	32.06
35.824	33.05
33.6	31.8
33.61	33.2
	32.12
Figure 2—figure supplemnet 1K
Con	Cers1KD
1380.72	1236.17
1486.42	1375.07
1781.61	1461.16
1769.96	1442.4
1467.5	1379.1
1449.5	1420.9
Figure 3—figure supplemnet 1A
Con	Cers1KD	Con	Cers1KD	Con	Cers1KD	Con	Cers1KD	Con	Cers1KD
1.73	0.49	1.42	0.23	1.38	0.22	1.2	0.95	1.09	0.93
0.55	0.7	0.55	1.05	0.93	0.65	0.83	0.71	1.18	0.87
0.97	0.79	0.65	0.72	0.41	0.49	0.85	0.5	0.75	0.7
0.99	0.5	0.7	0.47	0.78	1.09	1.09	1.08	0.99	0.84
0.83	0.41	1.77	1.02	1.38	0.32	1.07	0.9	1.15	0.69
0.93	0.34	0.92	0.58	1.12	0.46	0.96	0.77	0.85	0.68
Figure 3—figure supplemnet 1B
Con	Cers1KD
91	34
74	35
58	36
67.2	57.5
90.5	83
109	71.8
	74.5
	53.2
Figure 3—figure supplemnet 1C
Con	Cers1KD
1372	358
1010	372
726	388
876	714
1340	1182
1753	962
	1015
	639
Figure 3—figure supplemnet 1D
Con	Cers1KD
1.36	0.06
0.47	0.06
0.77	0.07
0.71	0.09
0.76	0.06
0.84	0.05
1.12	0.09
1.44	0.13
1.61	0.06
0.93	0.03
	0.06
Figure 3—figure supplemnet 1E
	Con			Cers1KD
Cer C14:0	4.91	3.82	5.48	2.31	3.98	5.44
Cer C16:0	257.21	250.72	283.94	285.67	284.82	326.12
Cer C18:0	10.77	12.71	12.02	7.65	7.76	6.41
Cer C18:1	7.01	6.88	7.11	3.08	4.5	2.22
Cer C20:0	6.55	5.74	4.28	2.4	2.15	2.97
Cer C22:0	33.02	31.98	37.98	25.14	31.02	33.46
Cer C24:0	169.09	168.37	182.24	248.39	198.38	233.46
Cer C24:1	83.88	87.45	90.79	121.51	124.14	137.99
Figure 3—figure supplemnet 1F
	Con			Cers1KD
dhCer C16:0	20.32	18.91	21.84	9.78	9.52	9.77
dhCer C18:0	3.08	2.81	2.9	1.12	1.52	1.89
dhCer C20:0	2.1	1.99	2.56	1.37	1.03	1.12
dhCer C22:0
dhCer C24:0	3.17	2.88	4.46	11.56	13.82	13.95
dhCer C24:1	2.42	2.53	2.54	8.61	9.98	9.03
Figure 3—figure supplemnet 1H
Con	Cers1KD		Con	Cers1KD		Con	Cers1KD
33.14	14.47		47430	28025		11	7
20.81	15.58		53750	31258		15	5
45.35	19.02		49306	33810		29	6
48.87	24.55		58914	27676		31	7
26.25	12.97		58711	30285		30	6
30.06	16.17		45128	28190		21	4
Figure 3—figure supplemnet 1I
Con	Cers1KD	Con	Cers1KD	Con	Cers1KD	Con	Cers1KD	Con	Cers1KD
1.42	2	1.6	0.12	1.02	0.33	1.76	0.57	0.57	0.13
1.53	0.72	0.96	0.14	1.12	0.83	0.99	0.72	1.37	0.19
0.96	0.74	1.14	0.34	1.25	0.52	0.89	0.38	0.94	0.25
0.61	0.64	0.82	0.62	0.94	0.58	0.61	0.51	1.11	0.18
0.59	1.01	0.89	1.03	0.91	0.5	0.59	0.25	0.91	0.16
0.63	1.36	0.81	0.19	0.91	0.7	0.73	0.31	0.65	0.07
0.92	0.73	1.07	0.06	1.31	0.58	1.15	0.64	1.08	0.16
1.37	0.69	1.32	0.23	1.14	0.68	1.32	0.55	1.63	0.22
1.1	0.82	0.98	0.45	0.83	0.55	1.09	0.44	1.08	0.22
1.12		0.94	0.79	1.11	0.54	0.99	0.38	0.97	0.17
0.78		0.77	1.28	0.85	0.6	0.97	0.28	1.18	0.12
0.96		0.71		0.61		0.92		0.5
Figure 4—figure supplemnet 1A
mTor con	mTor Cers1KD	Rps6kb1 con	Rps6kb1 Cers1KD	Eif4ebp1 con	Eif4ebp1 Cers1KD
1.06	1.02	0.91	1.05	1.09	0.98
0.92	0.94	1.05	1.2	0.93	1.17
0.96	0.98	1.1	0.97	0.82	1.07
1.08	0.87	0.92	1.19	1.24	1.01
1.02	0.98	0.97	0.97	0.94	1.13
1.02	0.92	1.08	1.06	0.99	0.99
0.93	0.89	0.97	0.93	0.99	0.94
Figure 4—figure supplemnet 1B
Con	Cers1KD
1.73	1.78
1.74	2.2
1.57	1.72
2.07	2.12
Figure 4—figure supplemnet 1D
Control MSTN	Cers1KD MST	Con Smad3	Cers1KD Smad3	Con Foxo1	Cers1KD Foxo1	Con atrogin-1	Cers1KD atrogin-1	Con murf	Cers1KD murf	Con ube2e1	Cers1KD ube2e1
1.04	1.34	0.86	1.47	1.17	1.21	0.87	1.32	1.12	1.34	0.98	1.24
0.71	1.45	0.79	1.55	1.07	1.01	0.8	1.29	0.84	1.57	0.89	1.24
0.91	1.33	1.13	1.15	0.84	1.1	1.16	1.13	0.92	0.96	1.04	1.2
1.2	1.13	1.07	1.1	1.09	1.44	0.89	1.19	1.13	1.1	0.98	1.26
0.88	1.17	1	1.2	0.8	1.28	1.06	1.19	0.89	1.52	1.14	1.11
1.23	1.16	1.06	1.34	1.36	1.36	0.96	1.13	1.16	1.18	0.95	1.26
1.02	1.49	1.09	1.05	0.91	1.72	1.12	1.11	0.94	1.09	1.02	1.14
				0.77		1.15
Figure 4—figure supplemnet 1E
Con	Cers1KD
0.85	0.62
0.85	0.34
1.31	0.3
Figure 4—figure supplemnet 1F
	Con						Cers1KD
dhCer C16:0	11.65	10.15	19.98	19.58	11.12	15.28	18.18	15.6	13.49	13.53	14.62	13.3
dhCer C18:0	9.91	6.81	10.03	8.97			4.73	3.99	2.5	2.19
dhCer C20
dhCer C22
dhCer C24:0	28.61	14.728	68.42	77.97	5.88		244	114.12	57.96	183.34	135.26	233.52
dhCer C24:1	1.98		2.84	2.87	2.81		23.5	30.8		17.4
Figure 4—figure supplemnet 1G
Con	Cers1KD
36	30
37	28
43	35
39	28
Figure 4—figure supplemnet 1H
Con	Cers1KD
32677	17367
30900	23542
31769	16095
32016	24936
Figure 4—figure supplemnet 1I
Con	Cers1KD
4	1
8	5
3	1
10	2
Figure 5—figure supplemnet 1A
Day	Control
1	0.08	0.08	0.1	0.09	0.04	0.05	0.05	0.08	0.15	0.12	0.05	0.13	0.16	0.12	0.14	0.05	0.13	0.1	0.09	0.01	0.15		0.04	0.03	0.17	0.1	0.12	0.07	0.08	0.05	0.07	0.09	0.04
3	0.14	0.16	0.09	0.04	0.01	0.06	0.15	0.18	0.2	0.05	0	0.02	0.01	0.2	0.12	0.11	0.08	0.04	0.1	0.21	0.21	0.22	0.05	0.19	0.03	0.04	0.16	0.12	0.11	0.13	0.13	0.16	0.06	0.05	0.1	0.05	0.16	0.18	0.19	0.03	0.06	0.23	0.12	0.07	0
5	0.08	0.06	0.06	0.06	0.03	0.08	0.08	0.14	0.09	0.02	0.1	0.1	0.06	0.07	0.08	0.15	0.1	0.05	0.08	0.02	0.05	0.05	0.11	0.06	0.09	0.06	0.13	0.06	0.1	0.09	0.02	0.07	0.07	0.13	0.02	0.07	0.05	0.04	0.08	0.13	0.1	0.13	0.03	0.13	0.06	0.05	0.05	0.03	0.07
Figure 5—figure supplemnet 1B
Con	P053
42	28
25	27
30	41
21	49
17	30
38	33
47	3
35	37
34	30
40	34
35	12
41	33
40	18
38	36
29	42
30	36
32	9
33	32
43	24
44	40
49	26
28	17
20	32
52	18
30	27
29	20
42	24
14	32
42	28
40	13
45	30
45	22
50	23
41
44
42
42
26
49
41
Figure 5—figure supplemnet 1C
Control			lagr-1 KD
0.97	1.17	0.85	0.15	0.24	0.23
Figure 5—figure supplemnet 1D
Day	Control
1	0.05	0.1	0.05	0.08	0.07	0.12	0.06	0.13	0.08	0.1	0.05	0.12	0.03	0.09	0.05	0.04	0.12	0.1	0.05		0.05	0.06		0.06	0.03		0.09	0.09	0.08	0.11	0.07			0.08	0.11	0.04	0.04	0.1		0.07				0.12		0.06	0.13	0.06	0.04
3	0.09	0.06	0.06	0.15	0.1	0.09	0.07	0.15	0.07	0.11	0.1		0.07	0.08	0.08	0.06	0.1	0.1	0.13	0.06	0.15	0.1	0.08	0.06	0.12	0.11	0.06	0.06		0.14	0.1	0.05	0.1	0.1		0.14	0.08	0.08		0.1	0.13	0.12	0.05	0.11	0.12	0.05	0.08		0.14
5	0.06	0.06	0.08	0.12	0.06	0.05	0.08	0.09	0.09	0.05	0.11	0.05	0.04	0.04	0.09		0.06	0.06	0.13	0.04	0.01	0.04	0.05	0.06	0.07	0.04	0.04	0.08	0.09	0.08	0.04	0.03	0.06	0.06	0.05	0.04	0.05	0.07	0.06	0.03	0.04	0.12	0.06	0.11	0.09	0.09	0.14
Figure 5—figure supplemnet 1G
Con	Cers1KD	Cers1KD + Cers2KD
28	13	25
36	19	33
43	27	37
32	24	35
37	21	34
20	12	20
Figure 5—figure supplemnet 1H
Con	Cers1KD	Cers1KD + Cers2KD
54932	25455	42649
44168	25376	37822
51689	27243	33115
46553	31271	54038
52037	31552	46312
48983	28830	40461
Figure 5—figure supplemnet 1I
Con	Cers1KD	Cers1KD + Cers2KD
15	3	15
16	8	12
11	5	10
23	4	10
19	8	16
10	3	12
[truncated: 104 more columns]
